# Supplementary material for: Interplay between genetic predisposition, macronutrient intake and type 2 diabetes incidence: analysis within EPIC-InterAct across eight European countries
Source: Springer Nature journal article supplement (doi:10.1007/s00125-018-4586-2), 2018-03-17
Supplement: MOESM1 [file 15543622]

## **Electronic Supplementary Material (ESM)**

ESM Methods 1: Detailed modelling for the main and interaction analyses

ESM Table 1: Imputed baseline variables for the EPIC-InterAct Study

ESM Table 2: Multiplicative interaction between macronutrient and unweighted genetic risk scores with isocaloric macronutrient substitution: EPIC-InterAct Study

ESM Table 3: Correlations between exposures within the EPIC-InterAct Study

ESM Table 4: Multiplicative interaction between macronutrient and unweighted genetic risk scores: EPIC-InterAct Study

ESM Table 5: SNP and macronutrient interactions with pvalue for interaction < 0.05

ESM Table 6: An example of interaction findings comparing multiple imputation and complete case analysis

ESM Figure 1: Flow chart of participant inclusion and exclusions, adapted from Langenberg et al., 2011

ESM Figure 2: Comparison between 20 imputed datasets for the interaction between total fibre intake and T2D genetic risk score on incident T2D

ESM Figure 3: QQ plot of pvalues for the interactions between individual SNPs for each of the genetic risk scores and macronutrients or dietary fibre on T2D (with isocaloric macronutrient substitution): EPIC-InterAct Study

## **ESM Methods 1: Detailed modelling for the main and interaction analyses**

### *Statistical analyses*

Variables that had <30% missing data (BMI, waist hip ratio, physical activity, education level and smoking status) were imputed using multiple imputation by chained equations in *Stata* (ESM Table 1) [1]. After confirming no obvious between-imputation variation across twenty multiple-imputation datasets [1], a single imputation was used for analyses because of computational efficiency (ESM Figure 1 provides an example). Complete-case analysis was also performed as sensitivity analysis. Potential outliers were Winsorized at the 1<sup>st</sup> and 99<sup>th</sup> percentile.

### *Main effect analyses*

The associations between macronutrient intake and type 2 diabetes were estimated by treating macronutrient exposures as continuous variables (per SD difference in percentage of total energy intake). Crude and multivariable-adjusted Prentice-weighted Cox regression models were constructed within country. For consistency, modelling was based as closely as possible on those used in previous EPIC-InterAct analyses for carbohydrate [2], protein [3] and dietary fibre [4]. For dietary fat and subtypes (not previously published in EPIC-InterAct), we specified models adjusted for age (underlying time scale), sex, centre (nominal categorical), total energy intake (Kcal/d), physical activity (inactive, moderately inactive, moderately active, active), education (none, primary school, technical/professional, secondary school, longer education (including university)), smoking (never, former, current smoker), sex-specific alcohol intake (none, light drinking: 0.1-6g/d, moderate drinking: men 6.1-24g/d and women 6.1-12g/d, heavy drinking: men>24g/d and women>12g/d) and other dietary confounders (dietary fibre, magnesium, iron, vitamin C, green leafy vegetables, tea and

coffee in mg or g/day). Food and beverage based confounders were chosen if they may be likely confounders between macronutrient intake and type 2 diabetes but were not major sources of macronutrient intake to preserve the variance of the macronutrient which the food represented. The variable ‘total energy intake’ included energy from carbohydrate, fat, protein and alcohol. The covariates used can be found in the legend of Table 1. Country-specific hazard ratios (HR) for each macronutrient intake were combined across countries using random-effects meta-analysis.

For the association between GRSs and type 2 diabetes, the GRSs were treated both as continuous (per SD difference) and dichotomised exposures (as high and low GRS estimates based on being above or below the median estimates among those in the subcohort) (Table 2). Prentice-weighted Cox regression models were constructed within country and by genotyping chip. Genotype chip-specific and then country-specific estimates were combined using random-effects meta-analysis. Analyses were adjusted for age (underlying time scale), sex, centre, the first 5 principal components for population stratification and BMI.

### *Interaction analyses*

For the interaction analyses between each macronutrient intake and each GRS on the risk of developing type 2 diabetes, both exposures were treated as continuous variables (GRS per SD difference and macronutrient as densities, being 5% of total energy intake/day and 1g/1000kcal/day for dietary fibre) to avoid loss of statistical power from categorisation. Multiplicative interaction was evaluated by fitting a product term between the GRS and macronutrient exposures [5]. Regression models were constructed in the same way as in analysis of the association between GRSs and incident type 2 diabetes, and the list of covariates included in the models were the same as for the main associations between macronutrient intake and type 2 diabetes (described above), with addition of the first 5 principal components for population stratification. Between-country heterogeneity was

quantified by the  $I^2$  value and  $P$  for heterogeneity was derived from the Cochran-Q test. BMI was a covariate in the interaction analysis for IR and type 2 diabetes GRSs only.

For visualisation, we also estimated HR for each dietary factor stratified by high and low GRS groups (Figure 1).

Given that GRSs may mask interactions with individual SNPs, further secondary interaction analysis was conducted for each SNP within all 3 GRSs. We also examined if a potential effect of substitution of a macronutrient for another was modified by genetic predisposition while energy intake was held constant (i.e. isocaloric macronutrient substitution using the multivariate nutrient density model) [6]. This was performed for energy-bearing macronutrients (not dietary fibre), with the modelling strategy provided in ESM Table 4.

*Stata* v14 (StataCorp LP, Texas, USA) was used for analysis. Numerical  $p$  value for interaction were reported in tables and figures however, the threshold for determining statistical significance for interactions between GRS and macronutrient intake (without isocaloric macronutrient substitution) was  $\leq 0.0015$  ( $0.05/33$  tests) to account for the effective number of independent tests among correlated exposures (see ESM Table 2 for correlations) [7]. The threshold for determining statistical significance for interactions under the substitution model was  $\leq 0.0006$  ( $0.05/81$  tests).

**ESM Table 1: Imputed baseline variables for the EPIC-InterAct Study**

| <b>Characteristics</b>             | <b>% missing</b> | <b>Imputed</b> |
|------------------------------------|------------------|----------------|
| <b>Number</b>                      |                  | 21900          |
| <b>Age (y)</b>                     | -                |                |
| <b>Sex (%male)</b>                 | -                |                |
| <b>PA level (%)</b>                | 1.1%             | Y              |
| inactive                           |                  |                |
| moderately inactive                |                  |                |
| moderately active                  |                  |                |
| active                             |                  |                |
| <b>Highest school level (%)</b>    | 1.7%             | Y              |
| none                               |                  |                |
| primary school                     |                  |                |
| technical/professional             |                  |                |
| secondary school                   |                  |                |
| longer education (inc. university) |                  |                |
| <b>BMI (kg/m<sup>2</sup>)</b>      | 0.7%             | Y              |
| <b>Waist hip ratio</b>             | 7.9%             | Y              |
| <b>Smoking status (%)</b>          | 1%               | Y              |
| never                              |                  |                |
| former                             |                  |                |
| current smoker                     |                  |                |



**ESM Table 2: Multiplicative interaction between macronutrient and unweighted genetic risk scores with isocaloric macronutrient substitution: EPIC-InterAct Study**

| Macronutrient intake (5% total energy intake) | Model (*sub=substituted)             | GRS for body mass index (per 6.3 risk alleles)% |       |                    | GRS for insulin resistance (per 4.5 risk alleles) |       |                    | GRS for type 2 diabetes (per 4.3 risk alleles) |       |                    |
|-----------------------------------------------|--------------------------------------|-------------------------------------------------|-------|--------------------|---------------------------------------------------|-------|--------------------|------------------------------------------------|-------|--------------------|
|                                               |                                      | Beta (95% CI)                                   | P     | I <sup>2</sup> (%) | Beta (95% CI)                                     | P     | I <sup>2</sup> (%) | Beta (95% CI)                                  | P     | I <sup>2</sup> (%) |
| <b>Carbohydrate</b>                           | <i>model 1</i>                       | 0.004(-0.024,0.032)                             | 0.779 | 34.3               | -0.003(-0.028,0.023)                              | 0.847 | 23.2               | -0.003(-0.025,0.02)                            | 0.815 | 1.3                |
|                                               | <i>model 2</i>                       | -0.003(-0.032,0.026)                            | 0.849 | 34.5               | -0.009(-0.042,0.023)                              | 0.586 | 44.9               | -0.008(-0.031,0.015)                           | 0.502 | 0.0                |
|                                               | <i>model 3</i>                       | -0.001(-0.033,0.032)                            | 0.961 | 44.5               | -0.006(-0.035,0.022)                              | 0.665 | 29.0               | -0.007(-0.032,0.017)                           | 0.555 | 5.4                |
|                                               | <i>model 4</i>                       |                                                 |       |                    | 0.004(-0.023,0.03)                                | 0.785 | 0.0                | 0.005(-0.029,0.039)                            | 0.774 | 26.5               |
|                                               | <i>model 5:sub with PUFA</i>         | -0.027(-0.141,0.087)                            | 0.642 | 29.2               | 0.012(-0.138,0.161)                               | 0.878 | 39.5               | 0.076(-0.033,0.184)                            | 0.172 | 0.0                |
|                                               | <i>model 5:sub with MUFA</i>         | 0.012(-0.046,0.071)                             | 0.680 | 0.0                | 0.033(-0.07,0.137)                                | 0.528 | 41.4               | -0.013(-0.108,0.083)                           | 0.797 | 32.5               |
| <b>Total protein</b>                          | <i>model 1</i>                       | -0.003(-0.065,0.059)                            | 0.923 | 11.0               | 0.05(-0.007,0.108)                                | 0.084 | 0.0                | -0.048(-0.112,0.015)                           | 0.136 | 13.7               |
|                                               | <i>model 2</i>                       | 0.001(-0.079,0.081)                             | 0.980 | 38.1               | 0.047(-0.013,0.106)                               | 0.125 | 0.0                | -0.046(-0.115,0.023)                           | 0.194 | 18.5               |
|                                               | <i>model 3</i>                       | -0.008(-0.071,0.056)                            | 0.815 | 4.0                | 0.056(-0.005,0.117)                               | 0.074 | 0.0                | -0.041(-0.123,0.04)                            | 0.319 | 36.9               |
|                                               | <i>model 4</i>                       |                                                 |       |                    | 0.048(-0.022,0.117)                               | 0.180 | 0.0                | -0.05(-0.128,0.028)                            | 0.213 | 15.1               |
|                                               | <i>model 5:sub with carbohydrate</i> | 0(-0.038,0.037)                                 | 0.991 | 57.2               | 0.005(-0.022,0.032)                               | 0.727 | 0.0                | 0.005(-0.028,0.037)                            | 0.767 | 20.9               |
|                                               | <i>model 5:sub with PUFA</i>         | -0.034(-0.147,0.08)                             | 0.561 | 29.2               | 0.014(-0.138,0.166)                               | 0.857 | 41.5               | 0.068(-0.04,0.177)                             | 0.215 | 0.0                |
|                                               | <i>model 5:sub with MUFA</i>         | 0.012(-0.046,0.071)                             | 0.676 | 0                  | 0.024(-0.087,0.136)                               | 0.671 | 49.4               | -0.023(-0.111,0.064)                           | 0.601 | 23.8               |
| <b>Animal protein</b>                         | <i>model 1</i>                       | 0.009(-0.059,0.076)                             | 0.805 | 37.3               | 0.027(-0.025,0.08)                                | 0.306 | 0                  | -0.041(-0.113,0.03)                            | 0.258 | 41.0               |
|                                               | <i>model 2</i>                       | 0.007(-0.063,0.078)                             | 0.835 | 35.1               | 0.022(-0.033,0.077)                               | 0.437 | 0                  | -0.036(-0.107,0.036)                           | 0.329 | 35.1               |



|                      |                                        |                      |       |      |                      |       |      |                      |       |      |
|----------------------|----------------------------------------|----------------------|-------|------|----------------------|-------|------|----------------------|-------|------|
|                      | <i>model 3</i>                         | 0.005(-0.059,0.07)   | 0.873 | 21.2 | 0.036(-0.031,0.103)  | 0.289 | 24.4 | -0.032(-0.116,0.052) | 0.460 | 49.5 |
|                      | <i>model 4</i>                         |                      |       |      | 0.026(-0.038,0.091)  | 0.425 | 0    | -0.048(-0.136,0.039) | 0.278 | 38.6 |
|                      | <i>model 5:sub with carbohydrate</i>   | 0(-0.037,0.037)      | 0.992 | 56.7 | 0.006(-0.021,0.032)  | 0.687 | 0    | 0.003(-0.028,0.033)  | 0.872 | 12.9 |
|                      | <i>model 5:sub with plant protein</i>  | -0.041(-0.179,0.096) | 0.556 | 0    | 0.07(-0.106,0.247)   | 0.434 | 12.5 | 0(-0.18,0.179)       | 0.996 | 12.3 |
| <b>Plant protein</b> | <i>model 1</i>                         | -0.041(-0.168,0.087) | 0.533 | 0.0  | 0.059(-0.112,0.231)  | 0.499 | 32.8 | 0.025(-0.154,0.205)  | 0.780 | 40.0 |
|                      | <i>model 2</i>                         | -0.059(-0.191,0.073) | 0.384 | 0    | 0.066(-0.11,0.242)   | 0.463 | 31.5 | 0.01(-0.176,0.196)   | 0.917 | 40.6 |
|                      | <i>model 3</i>                         | -0.06(-0.197,0.076)  | 0.384 | 0.0  | 0.094(-0.07,0.259)   | 0.260 | 19.3 | 0.01(-0.171,0.191)   | 0.916 | 34.3 |
|                      | <i>model 4</i>                         |                      |       |      | 0.079(-0.084,0.243)  | 0.342 | 3.6  | -0.009(-0.192,0.173) | 0.921 | 15.6 |
|                      | <i>model 5:sub with carbohydrate</i>   | 0.001(-0.037,0.038)  | 0.974 | 57.2 | 0.002(-0.026,0.031)  | 0.869 | 7.6  | 0.003(-0.028,0.034)  | 0.855 | 14.7 |
| <b>Total fat</b>     | <i>model 1</i>                         | 0.008(-0.017,0.033)  | 0.552 | 0.0  | -0.005(-0.037,0.028) | 0.772 | 32.0 | 0.017(-0.009,0.044)  | 0.188 | 0.0  |
|                      | <i>model 2</i>                         | 0.012(-0.014,0.037)  | 0.375 | 0.0  | -0.004(-0.041,0.033) | 0.833 | 41.7 | 0.016(-0.011,0.043)  | 0.248 | 0.0  |
|                      | <i>model 3</i>                         | 0.01(-0.017,0.036)   | 0.471 | 0.0  | -0.007(-0.04,0.025)  | 0.653 | 22.5 | 0.016(-0.012,0.045)  | 0.267 | 5.9  |
|                      | <i>model 4</i>                         |                      |       |      | -0.004(-0.048,0.041) | 0.869 | 41.2 | 0.011(-0.021,0.043)  | 0.497 | 0.0  |
|                      | <i>model 5:sub with carbohydrate</i>   | 0.001(-0.032,0.034)  | 0.955 | 44.3 | 0(-0.028,0.029)      | 0.986 | 9.3  | 0.004(-0.03,0.037)   | 0.833 | 23.6 |
|                      | <i>model 5:sub with total protein</i>  | -0.008(-0.074,0.059) | 0.821 | 10.9 | 0.049(-0.021,0.119)  | 0.168 | 0    | -0.057(-0.138,0.024) | 0.167 | 19.7 |
|                      | <i>model 5:sub with plant protein</i>  | -0.058(-0.197,0.08)  | 0.407 | 0    | 0.066(-0.116,0.248)  | 0.475 | 16.1 | -0.014(-0.21,0.183)  | 0.892 | 24.0 |
|                      | <i>model 5:sub with animal protein</i> | 0.004(-0.061,0.069)  | 0.898 | 21.2 | 0.034(-0.035,0.103)  | 0.335 | 9.1  | -0.05(-0.134,0.034)  | 0.247 | 33.3 |
| <b>SFA</b>           | <i>model 1</i>                         | 0.022(-0.03,0.073)   | 0.407 | 12.2 | -0.019(-0.068,0.03)  | 0.444 | 0    | 0.047(-0.003,0.096)  | 0.066 | 0    |
|                      | <i>model 2</i>                         | 0.033(-0.018,0.085)  | 0.208 | 8.5  | -0.021(-0.073,0.03)  | 0.412 | 0    | 0.045(-0.006,0.096)  | 0.085 | 0    |
|                      | <i>model 3</i>                         | 0.031(-0.019,0.08)   | 0.228 | 0    | -0.027(-0.08,0.025)  | 0.311 | 0    | 0.046(-0.007,0.1)    | 0.09  | 2.9  |
|                      | <i>model 4</i>                         |                      |       |      | -0.015(-0.089,0.058) | 0.687 | 22.8 | 0.027(-0.034,0.089)  | 0.384 | 0    |

|             |                                        |                      |       |      |                      |       |      |                      |       |      |
|-------------|----------------------------------------|----------------------|-------|------|----------------------|-------|------|----------------------|-------|------|
|             | <i>model 5:sub with carbohydrate</i>   | 0.001(-0.036,0.038)  | 0.957 | 54.4 | 0.003(-0.024,0.03)   | 0.85  | 0    | 0.001(-0.031,0.033)  | 0.941 | 18.7 |
|             | <i>model 5:sub with plant protein</i>  | -0.045(-0.183,0.094) | 0.526 | 0    | 0.064(-0.114,0.243)  | 0.479 | 13.4 | -0.004(-0.185,0.178) | 0.966 | 13.7 |
|             | <i>model 5:sub with animal protein</i> | 0.002(-0.061,0.064)  | 0.96  | 14.1 | 0.027(-0.039,0.092)  | 0.425 | 0    | -0.052(-0.14,0.037)  | 0.25  | 38.8 |
|             | <i>model 5:sub with total protein</i>  | -0.01(-0.072,0.052)  | 0.753 | 0    | 0.046(-0.025,0.116)  | 0.206 | 0    | -0.054(-0.135,0.028) | 0.195 | 19.7 |
|             | <i>model 5:sub with PUFA</i>           | -0.031(-0.146,0.083) | 0.593 | 29.6 | 0.006(-0.142,0.153)  | 0.939 | 37.9 | 0.075(-0.033,0.183)  | 0.173 | 0    |
|             | <i>model 5:sub with MUFA</i>           | 0.013(-0.046,0.072)  | 0.671 | 0    | 0.035(-0.073,0.143)  | 0.528 | 45.3 | -0.008(-0.105,0.089) | 0.869 | 33.7 |
| <b>MUFA</b> | <i>model 1</i>                         | 0.01(-0.046,0.066)   | 0.724 | 0    | -0.001(-0.079,0.077) | 0.982 | 35.7 | 0.002(-0.075,0.08)   | 0.95  | 34.0 |
|             | <i>model 2</i>                         | 0.015(-0.043,0.072)  | 0.617 | 0    | -0.005(-0.083,0.073) | 0.902 | 31.7 | 0.001(-0.083,0.084)  | 0.987 | 38.9 |
|             | <i>model 3</i>                         | 0.014(-0.044,0.073)  | 0.634 | 0    | -0.003(-0.088,0.083) | 0.949 | 38.5 | -0.003(-0.092,0.087) | 0.954 | 43.8 |
|             | <i>model 4</i>                         |                      |       |      | 0.023(-0.087,0.133)  | 0.685 | 48.5 | -0.016(-0.097,0.065) | 0.699 | 15.3 |
|             | <i>model 5:sub with plant protein</i>  | -0.045(-0.183,0.094) | 0.527 | 0    | 0.054(-0.137,0.246)  | 0.576 | 21.9 | -0.01(-0.197,0.177)  | 0.916 | 17.5 |
|             | <i>model 5:sub with animal protein</i> | 0(-0.066,0.066)      | 0.996 | 22.4 | 0.031(-0.036,0.098)  | 0.37  | 3.1  | -0.052(-0.136,0.032) | 0.226 | 33.2 |
| <b>PUFA</b> | <i>model 1</i>                         | -0.042(-0.124,0.039) | 0.309 | 0    | -0.019(-0.129,0.092) | 0.742 | 32.9 | 0.036(-0.05,0.123)   | 0.408 | 0    |
|             | <i>model 2</i>                         | -0.039(-0.141,0.064) | 0.459 | 21.9 | -0.025(-0.119,0.068) | 0.598 | 7.97 | 0.044(-0.047,0.134)  | 0.342 | 0    |
|             | <i>model 3</i>                         | -0.042(-0.155,0.072) | 0.471 | 30.5 | -0.019(-0.109,0.071) | 0.676 | 1.1  | 0.044(-0.048,0.136)  | 0.351 | 0    |
|             | <i>model 4</i>                         |                      |       |      | 0.01(-0.139,0.16)    | 0.895 | 40.4 | 0.072(-0.039,0.182)  | 0.204 | 2.2  |
|             | <i>model 5:sub with plant protein</i>  | -0.046(-0.185,0.092) | 0.51  | 0    | 0.065(-0.111,0.241)  | 0.467 | 11.5 | -0.004(-0.198,0.189) | 0.964 | 22.1 |
|             | <i>model 5:sub with animal protein</i> | 0.002(-0.059,0.064)  | 0.938 | 12.2 | 0.028(-0.038,0.093)  | 0.41  | 0    | -0.05(-0.135,0.036)  | 0.255 | 35.3 |
|             | <i>model 5:sub with MUFA</i>           | 0.018(-0.04,0.077)   | 0.544 | 0    | 0.034(-0.076,0.144)  | 0.545 | 47.5 | -0.01(-0.109,0.089)  | 0.842 | 36.2 |

|                            |                |                      |       |      |                      |       |      |                      |       |      |
|----------------------------|----------------|----------------------|-------|------|----------------------|-------|------|----------------------|-------|------|
| <b>Total dietary fibre</b> | <i>model 1</i> | 0.005(-0.005,0.015)  | 0.346 | 0    | 0(-0.011,0.012)      | 0.95  | 20.9 | 0.001(-0.009,0.011)  | 0.86  | 0    |
|                            | <i>model 2</i> | 0.005(-0.006,0.015)  | 0.382 | 0    | -0.003(-0.017,0.012) | 0.723 | 36.5 | 0.001(-0.01,0.011)   | 0.919 | 0    |
|                            | <i>model 3</i> | 0.005(-0.006,0.015)  | 0.385 | 0    | -0.004(-0.017,0.01)  | 0.602 | 28.6 | 0.002(-0.009,0.013)  | 0.76  | 0    |
|                            | <i>model 4</i> |                      |       |      | 0(-0.015,0.016)      | 0.951 | 24.5 | 0.001(-0.011,0.013)  | 0.875 | 0    |
| <b>Vegetable fibre</b>     | <i>model 1</i> | -0.001(-0.026,0.024) | 0.921 | 0    | -0.008(-0.045,0.03)  | 0.688 | 44.7 | 0.003(-0.023,0.03)   | 0.81  | 0    |
|                            | <i>model 2</i> | 0.004(-0.026,0.033)  | 0.802 | 11.4 | -0.013(-0.054,0.029) | 0.553 | 51.1 | 0.002(-0.025,0.029)  | 0.897 | 0    |
|                            | <i>model 3</i> | -0.002(-0.033,0.029) | 0.903 | 10.6 | -0.009(-0.048,0.031) | 0.66  | 41.1 | 0.007(-0.021,0.035)  | 0.618 | 0    |
|                            | <i>model 4</i> |                      |       |      | -0.011(-0.042,0.02)  | 0.49  | 2.1  | 0.013(-0.019,0.044)  | 0.433 | 0    |
| <b>Fruit fibre</b>         | <i>model 1</i> | 0.006(-0.012,0.024)  | 0.53  | 0    | 0(-0.026,0.027)      | 0.981 | 40.1 | -0.003(-0.029,0.022) | 0.79  | 33.7 |
|                            | <i>model 2</i> | 0.005(-0.016,0.027)  | 0.637 | 16.2 | -0.003(-0.031,0.025) | 0.83  | 43.1 | -0.004(-0.034,0.026) | 0.799 | 45.4 |
|                            | <i>model 3</i> | 0.004(-0.015,0.023)  | 0.662 | 0    | -0.006(-0.036,0.025) | 0.721 | 47.1 | -0.002(-0.036,0.033) | 0.928 | 54.5 |
|                            | <i>model 4</i> |                      |       |      | 0.001(-0.042,0.045)  | 0.948 | 66.5 | -0.001(-0.043,0.041) | 0.965 | 60.2 |
| <b>Cereal fibre</b>        | <i>model 1</i> | -0.003(-0.019,0.013) | 0.695 | 0    | 0.003(-0.014,0.02)   | 0.742 | 0    | 0.002(-0.017,0.022)  | 0.829 | 17.0 |
|                            | <i>model 2</i> | -0.006(-0.023,0.01)  | 0.452 | 0    | -0.001(-0.018,0.017) | 0.925 | 0    | 0.006(-0.012,0.024)  | 0.52  | 5.5  |
|                            | <i>model 3</i> | -0.006(-0.023,0.011) | 0.472 | 0    | -0.002(-0.021,0.016) | 0.795 | 4.2  | 0.006(-0.011,0.024)  | 0.476 | 0    |
|                            | <i>model 4</i> |                      |       |      | -0.008(-0.029,0.014) | 0.489 | 5.5  | 0.006(-0.016,0.028)  | 0.606 | 9.8  |

Abbreviations: SFA- saturated fatty acid, MUFA- monounsaturated fatty acid, PUFA- polyunsaturated fatty acid, GRS- genetic risk score

Macronutrients are represented by per 5% of total energy intake and dietary fibre by per g/1000kcal.

**Beta-coefficient for the interaction between each of the genetic risk score with the following macronutrients on incident T2D are adjusted for the following covariates.**

#### Macronutrient

Model 1: age (=underlying time scale), sex, centre, total energy (TEI), first 5 principal component (PC) for population stratification

Model 2: model 1 + lifestyle factors- physical activity, education, smoking, sex-specific alcohol categories

Model 3: model 2+ dietary covariates (dietary fibre, magnesium, iron, vitamin C, leafy vegetables, tea, coffee)

Model 4: model 3+ BMI

Model 5: model 4+ isocaloric macronutrient substitution

#### Dietary fibre

Model 1: age (=underlying time scale), sex, centre, TEI, first 5 PC for population stratification

Model 2: model 1 + lifestyle factors- physical activity, education, smoking, sex-specific alcohol categories

Model 3: model 2+ dietary covariates (carbohydrate, SFA, MUFA, PUFA intake, magnesium, iron, vitamin C, leafy vegetable, tea, coffee )

Model 4: model 3+ BMI

fibre subtypes: last model includes mutual adjustment

& There is no adjustment for BMI for interactions models with BMI GRS

**Example of interpretation:** the beta-coefficient of the interaction between total fat and BMI GRS was 0.001 for incident T2D, when fat replaced carbohydrate intake. However, this was not statistically significant because the 95% confidence interval is -0.032 and 0.034.

**Iso-caloric macronutrient substitution:  $\alpha$  for significant interaction < 6.17E-4 (0.05/81 tests)**

**ESM Table 3: Correlations between exposures within the EPIC-InterAct Study**

| Exposures | T2D<br>GRS | IR<br>GRS | BMI<br>GRS | fat | sfa  | mufa | pufa | prot | prota | protp | cho  | fb   | fb_veg | fb_fruit | fb_cereal |
|-----------|------------|-----------|------------|-----|------|------|------|------|-------|-------|------|------|--------|----------|-----------|
| fat       | 0.01       | 0.01      | 0.00       |     | 0.71 | 0.70 | 0.40 | 0.01 | 0.13  | 0.37  | 0.61 | 0.30 | 0.03   | 0.20     | 0.29      |
| sfa       | 0.01       | 0.01      | 0.01       |     |      | 0.21 | 0.11 | 0.21 | 0.04  | 0.57  | 0.31 | 0.35 | 0.27   | 0.30     | 0.05      |
| mufa      | 0.00       | 0.00      | 0.00       |     |      |      | 0.03 | 0.15 | 0.21  | 0.12  | 0.52 | 0.26 | 0.03   | 0.01     | 0.41      |
| pufa      | 0.00       | 0.01      | 0.02       |     |      |      |      | 0.01 | 0.01  | 0.03  | 0.25 | 0.06 | 0.15   | 0.11     | 0.00      |
| prot      | 0.00       | 0.00      | 0.03       |     |      |      |      |      | 0.04  | 0.04  | 0.32 | 0.17 | 0.37   | 0.18     | 0.15      |
| prota     | 0.00       | 0.00      | 0.02       |     |      |      |      |      |       | 0.25  | 0.47 | 0.05 | 0.24   | 0.11     | 0.25      |
| protp     | 0.01       | 0.00      | 0.01       |     |      |      |      |      |       |       | 0.30 | 0.63 | 0.36   | 0.24     | 0.36      |
| cho       | 0.01       | 0.00      | 0.02       |     |      |      |      |      |       |       |      | 0.37 | 0.07   | 0.24     | 0.35      |
| fb        | 0.01       | 0.00      | 0.01       |     |      |      |      |      |       |       |      |      | 0.53   | 0.52     | 0.43      |
| fb_veg    | 0.01       | 0.01      | 0.01       |     |      |      |      |      |       |       |      |      |        | 0.32     | 0.13      |
| fb_fruit  | 0.02       | 0.00      | 0.01       |     |      |      |      |      |       |       |      |      |        |          | 0.13      |
| fb_cereal | 0.01       | 0.00      | 0.00       |     |      |      |      |      |       |       |      |      |        |          |           |

**Strength of correlation**

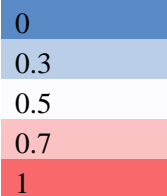

Spearman’s Rho, without direction of correlation.

Abbreviations: sfa- saturated fatty acid, mufa- monounsaturated fatty acid, pufa- polyunsaturated fatty acid, prota- animal protein, protp- plant protein, cho- carbohydrate, fb- fibre, fb\_veg: vegetable fibre, fb\_fruit: fruit fibre, fb\_cereal: cereal fibre.

All variables treated as continuous variables

Correlations calculated based on subcohort population only (N=12749)

Effective number of independent tests:[7] for the interaction between genetic risk scores and macronutrient interactions (without isocaloric macronutrient substitution): 10.9776 (variance of the observed eigenvalues: 1.12). This estimates the independent number of tests, accounting for any correlated macronutrients.

## ESM Table 4: Multiplicative interaction between macronutrient and unweighted genetic risk scores: EPIC-InterAct Study

| Macronutrient intake (5% total energy intake) | Model                          | GRS for body mass index (per 6.3 risk alleles) <sup>%</sup> |       |                    | GRS for insulin resistance (per 4.5 risk alleles) |       |                    | GRS for type 2 diabetes (per 4.3 risk alleles) |       |                    |
|-----------------------------------------------|--------------------------------|-------------------------------------------------------------|-------|--------------------|---------------------------------------------------|-------|--------------------|------------------------------------------------|-------|--------------------|
|                                               |                                | Beta (95% CI)                                               | P     | I <sup>2</sup> (%) | Beta (95% CI)                                     | P     | I <sup>2</sup> (%) | Beta (95% CI)                                  | P     | I <sup>2</sup> (%) |
| Carbohydrate                                  | <i>Shuijs et al., 2013</i>     | 0.001(-0.034,0.035)                                         | 0.971 | 50.2               | 0.001(-0.03,0.031)                                | 0.970 | 19.1               | 0(-0.028,0.027)                                | 0.976 | 0.0                |
| Total protein                                 | <i>van Nielen et al., 2014</i> | -0.032(-0.1,0.036)                                          | 0.351 | 0.0                | 0.062(-0.035,0.16)                                | 0.210 | 37.9               | -0.06(-0.162,0.042)                            | 0.249 | 43.4               |
| Animal protein                                | <i>van Nielen et al., 2014</i> | -0.022(-0.083,0.039)                                        | 0.475 | 0.0                | 0.055(-0.048,0.158)                               | 0.293 | 51.6               | -0.05(-0.145,0.045)                            | 0.302 | 45.5               |
| Plant protein                                 | <i>van Nielen et al., 2014</i> | -0.057(-0.206,0.091)                                        | 0.451 | 0.0                | 0.004(-0.241,0.249)                               | 0.975 | 49.0               | -0.022(-0.185,0.142)                           | 0.793 | 0.0                |
| Total fat                                     | <i>model 4</i>                 | 0.01(-0.017,0.036)                                          | 0.471 | 0.0                | -0.004(-0.048,0.041)                              | 0.869 | 41.2               | 0.011(-0.021,0.043)                            | 0.497 | 0.0                |
| SFA                                           | <i>model 4</i>                 | 0.031(-0.019,0.08)                                          | 0.228 | 0.0                | -0.015(-0.089,0.058)                              | 0.687 | 22.8               | 0.027(-0.034,0.089)                            | 0.384 | 0.0                |
| MUFA                                          | <i>model 4</i>                 | 0.014(-0.044,0.073)                                         | 0.634 | 0.0                | 0.023(-0.087,0.133)                               | 0.685 | 48.5               | -0.016(-0.097,0.065)                           | 0.699 | 15.3               |
| PUFA                                          | <i>model 4</i>                 | -0.042(-0.155,0.072)                                        | 0.471 | 30.5               | 0.01(-0.139,0.16)                                 | 0.895 | 40.4               | 0.072(-0.039,0.182)                            | 0.204 | 2.2                |
| Total dietary fibre (g/1000kcal)              | <i>Aune et al., 2015</i>       | 0.004(-0.006,0.015)                                         | 0.408 | 0.0                | -0.004(-0.019,0.011)                              | 0.623 | 44.7               | -0.001(-0.011,0.01)                            | 0.919 | 0.0                |
| Vegetable fibre (g/1000kcal)                  | <i>Aune et al., 2015</i>       | 0(-0.029,0.028)                                             | 0.973 | 6.8                | -0.012(-0.053,0.028)                              | 0.548 | 46.4               | 0.007(-0.021,0.035)                            | 0.634 | 0.0                |
| Fruit fibre (g/1000kcal)                      | <i>Aune et al., 2015</i>       | 0.013(-0.008,0.033)                                         | 0.222 | 0.0                | -0.007(-0.036,0.022)                              | 0.632 | 40.8               | -0.001(-0.029,0.026)                           | 0.927 | 30.2               |
| Cereal fibre (g/1000kcal)                     | <i>Aune et al., 2015</i>       | -0.005(-0.022,0.012)                                        | 0.568 | 0.0                | -0.002(-0.02,0.015)                               | 0.799 | 0.0                | 0.004(-0.018,0.025)                            | 0.735 | 21.5               |

Abbreviations: SFA- saturated fatty acid, MUFA- monounsaturated fatty acid, PUFA- polyunsaturated fatty acid, GRS- genetic risk score

**Beta-coefficient for the interaction between each of the genetic risk score and respective macronutrients on incident T2D, adjusted for the following covariates (as per previously published EPIC-InterAct study, see methods).**

**Carbohydrate** age (=underlying time scale), sex, centre, education, physical activity, BMI, smoking status, sex-specific alcohol categories, total energy intake, dietary protein, PUFA:SFA ratio, dietary fibre, first 5 principal components (PC) for population stratification

### Protein and subtypes

age (=underlying time scale), total energy intake (TEI), centre, and sex, smoking, education, physical activity, sex-specific alcohol categories, dietary fibre, SFA, MUFA, PUFA, soft drinks, tea, and coffee (not adjusted for carbohydrates; i.e., a substitution model), BMI, waist hip ratio, first 5 PC for population stratification

### Fat and subtypes

Model 1: age (=underlying time scale), sex, centre, TEI, first 5 PC for population stratification

Model 2: model 1 + lifestyle factors- physical activity, education, smoking, sex-specific alcohol categories

Model 3: model 2+ dietary covariates (dietary fibre, magnesium, iron, vitamin C, leafy vegetables, tea, coffee)

Model 4: model 3+ BMI

### Dietary fibre and subtypes

age (=underlying time scale), sex, smoking status, physical activity, education level and sex-specific alcohol categories, total energy intake, dietary carbohydrates, magnesium, saturated fatty acids, first 5 PC for population stratification, types of fibre were mutually adjusted

Trying to replicate model 3.

& interactions with BMI GRS does not adjust for BMI

IR GRS and protein intake interaction does not adjust for centre because of convergence issues

**Example of interpretation:** the beta-coefficient of the interaction between total fat and BMI GRS was 0.010 for incident T2D.

**ESM Table 5: SNP and macronutrient interactions with pvalue for interaction<0.05**

GRS: genetic risk score

snp: single nucleotide polymorphism

macro: macronutrient intake

submacro: macronutrient being substituted for (this is being replaced)

beta: beta coefficient

se: standard error

lci: lower confidence interval

uci: upper confidence interval

p\_int: pvalue for interaction

i\_sq: I squared for heterogeneity

p\_het: pvalue for heterogeneity

Threshold for p value for interaction after Bonferroni correction< 9.4E-06

Analysis:

GRS per SD

Macronutrient per 5%TEI



| GRS | snp       | macro           | submacro       | beta     | se       | lci      | uci      | p_int    | i_sq     | p_het    |
|-----|-----------|-----------------|----------------|----------|----------|----------|----------|----------|----------|----------|
| T2D | rs3802177 | MUFA            | PUFA           | -0.19363 | 0.053498 | -0.29848 | -0.08877 | 0.000295 | 0        | 0.947871 |
| T2D | rs3802177 | MUFA            | protein        | -0.18882 | 0.053118 | -0.29293 | -0.08472 | 0.000378 | 0        | 0.876609 |
| T2D | rs3802177 | MUFA            | SFA            | -0.18842 | 0.053497 | -0.29327 | -0.08356 | 0.000428 | 0        | 0.7951   |
| BMI | rs1772499 | protein         | fat            | -0.17888 | 0.050957 | -0.27876 | -0.07901 | 0.000447 | 0        | 0.532623 |
| BMI | rs1772499 | protein         | SFA            | -0.17796 | 0.051264 | -0.27843 | -0.07748 | 0.000518 | 0        | 0.54333  |
| T2D | rs3802177 | MUFA            | carbohydrate   | -0.18391 | 0.053222 | -0.28822 | -0.0796  | 0.000549 | 0        | 0.652556 |
| IR  | rs6937438 | PUFA            | protein        | -0.27893 | 0.083807 | -0.44319 | -0.11467 | 0.000874 | 0        | 0.46869  |
| IR  | rs6937438 | PUFA            | SFA            | -0.27669 | 0.083982 | -0.44129 | -0.11209 | 0.000986 | 0        | 0.43715  |
| IR  | rs6937438 | PUFA            | carbohydrate   | -0.27449 | 0.084018 | -0.43916 | -0.10982 | 0.001087 | 0        | 0.46117  |
| BMI | rs3849570 | carbohydrate    | SFA            | -0.0574  | 0.01768  | -0.09205 | -0.02275 | 0.001168 | 0        | 0.578912 |
| BMI | rs3849570 | carbohydrate    | fat            | -0.05674 | 0.017515 | -0.09107 | -0.02241 | 0.001198 | 0        | 0.695759 |
| BMI | rs3849570 | carbohydrate    | protein-plant  | -0.05618 | 0.01753  | -0.09054 | -0.02182 | 0.001353 | 0        | 0.580342 |
| BMI | rs3849570 | carbohydrate    | protein        | -0.05506 | 0.0173   | -0.08897 | -0.02115 | 0.00146  | 0        | 0.658406 |
| BMI | rs3849570 | carbohydrate    | protein-animal | -0.05488 | 0.017361 | -0.0889  | -0.02085 | 0.001572 | 0        | 0.675645 |
| BMI | rs1928295 | protein         | SFA            | 0.133487 | 0.044466 | 0.046336 | 0.220639 | 0.002682 | 0        | 0.876518 |
| BMI | rs1928295 | protein         | fat            | 0.130323 | 0.044159 | 0.043773 | 0.216873 | 0.003165 | 0        | 0.793691 |
| IR  | rs2249105 | fibre-fruit     | fruit          | 0.044212 | 0.015813 | 0.01322  | 0.075204 | 0.005174 | 0        | 0.815511 |
| T2D | rs6878122 | PUFA            | SFA            | -0.23937 | 0.088628 | -0.41308 | -0.06567 | 0.006916 | 8.402164 | 0.365208 |
| BMI | rs4256980 | protein-animal  | PUFA           | -0.11021 | 0.041447 | -0.19145 | -0.02898 | 0.007835 | 0        | 0.691283 |
| BMI | rs1772499 | protein-animal  | MUFA           | -0.14014 | 0.052708 | -0.24345 | -0.03684 | 0.007841 | 17.57618 | 0.291157 |
| BMI | rs9540493 | protein-plant   | protein-animal | -0.26878 | 0.101136 | -0.467   | -0.07055 | 0.00787  | 0        | 0.882251 |
| T2D | rs6878122 | PUFA            | carbohydrate   | -0.24617 | 0.092727 | -0.42791 | -0.06443 | 0.007936 | 13.21932 | 0.326783 |
| BMI | rs1772499 | protein-animal  | SFA            | -0.14223 | 0.053795 | -0.24767 | -0.0368  | 0.008194 | 20.47793 | 0.267142 |
| BMI | rs1928295 | protein-animal  | MUFA           | 0.105908 | 0.040259 | 0.027001 | 0.184815 | 0.008522 | 0        | 0.651991 |
| BMI | rs1928295 | protein-animal  | PUFA           | 0.105886 | 0.04028  | 0.026938 | 0.184833 | 0.00857  | 0        | 0.59184  |
| IR  | rs1740295 | fibre-cereal    | fruit          | -0.09136 | 0.034859 | -0.15968 | -0.02304 | 0.008772 | 0        | 0.537019 |
| BMI | rs4256980 | protein-animal  | fat            | -0.10794 | 0.041355 | -0.18899 | -0.02688 | 0.009054 | 0        | 0.750602 |
| T2D | rs6878122 | PUFA            | protein        | -0.26542 | 0.102168 | -0.46566 | -0.06517 | 0.009381 | 24.8121  | 0.231158 |
| BMI | rs1772499 | protein-animal  | PUFA           | -0.13636 | 0.052769 | -0.23979 | -0.03294 | 0.009761 | 18.32404 | 0.284983 |
| BMI | rs1928295 | protein-animal  | SFA            | 0.103671 | 0.040459 | 0.024373 | 0.182968 | 0.010396 | 0        | 0.683063 |
| BMI | rs1772499 | protein-animal  | fat            | -0.14301 | 0.056116 | -0.25299 | -0.03303 | 0.010819 | 26.50896 | 0.217128 |
| BMI | rs3101336 | carbohydrate    | protein-animal | 0.043364 | 0.017025 | 0.009996 | 0.076732 | 0.010861 | 0        | 0.675347 |
| BMI | rs3101336 | carbohydrate    | protein        | 0.043137 | 0.016993 | 0.009831 | 0.076444 | 0.011134 | 0        | 0.623208 |
| BMI | rs4256980 | protein         | fat            | -0.11525 | 0.04542  | -0.20427 | -0.02623 | 0.011165 | 0        | 0.744068 |
| BMI | rs1244663 | fibre-total     | fruitw         | 0.027329 | 0.010785 | 0.006191 | 0.048467 | 0.011275 | 0        | 0.707056 |
| BMI | rs3101336 | carbohydrate    | protein-plant  | 0.043401 | 0.017153 | 0.009782 | 0.077019 | 0.011397 | 0        | 0.657618 |
| BMI | rs4256980 | protein-animal  | MUFA           | -0.10428 | 0.041583 | -0.18578 | -0.02278 | 0.012153 | 0        | 0.652189 |
| BMI | rs9540493 | protein-plant   | SFA            | -0.25501 | 0.10177  | -0.45448 | -0.05554 | 0.01222  | 0        | 0.77929  |
| BMI | rs9540493 | protein-plant   | PUFA           | -0.25442 | 0.101563 | -0.45348 | -0.05536 | 0.012243 | 0        | 0.707261 |
| BMI | rs6091540 | fibre-vegetable | fruit          | 0.065897 | 0.026366 | 0.01422  | 0.117575 | 0.012444 | 19.60749 | 0.274361 |
| BMI | rs1928295 | protein-animal  | fat            | 0.101102 | 0.040475 | 0.021772 | 0.180433 | 0.012494 | 0.885112 | 0.4224   |
| BMI | rs7899106 | PUFA            | protein        | 0.335853 | 0.134785 | 0.07168  | 0.600027 | 0.012711 | 0        | 0.814747 |
| BMI | rs3101336 | carbohydrate    | SFA            | 0.043032 | 0.017292 | 0.00914  | 0.076924 | 0.012827 | 0        | 0.779073 |
| BMI | rs7164727 | fibre-total     | fruitw         | 0.020231 | 0.008135 | 0.004287 | 0.036176 | 0.012884 | 0        | 0.899224 |
| T2D | rs780094  | MUFA            | protein        | -0.12225 | 0.04934  | -0.21895 | -0.02554 | 0.013226 | 0        | 0.435059 |
| BMI | rs9540493 | protein-plant   | fat            | -0.25045 | 0.101113 | -0.44863 | -0.05227 | 0.013252 | 0        | 0.681441 |
| BMI | rs4256980 | protein         | SFA            | -0.11204 | 0.045796 | -0.2018  | -0.02228 | 0.014426 | 0        | 0.669374 |

| GRS | snp       | macro           | submacro       | beta     | se       | lci      | uci      | p_int    | i_sq     | p_het    |
|-----|-----------|-----------------|----------------|----------|----------|----------|----------|----------|----------|----------|
| T2D | rs2943640 | protein         | SFA            | 0.133863 | 0.054792 | 0.026473 | 0.241252 | 0.014561 | 3.893046 | 0.399966 |
| BMI | rs9540493 | protein-plant   | MUFA           | -0.24835 | 0.101956 | -0.44818 | -0.04852 | 0.014856 | 0        | 0.821749 |
| BMI | rs2112347 | fibre-cereal    | fruit          | -0.03464 | 0.014284 | -0.06264 | -0.00665 | 0.01529  | 10.75583 | 0.346583 |
| BMI | rs4256980 | protein-animal  | SFA            | -0.10061 | 0.041671 | -0.18228 | -0.01894 | 0.015759 | 0        | 0.72759  |
| BMI | rs3101336 | carbohydrate    | fat            | 0.041177 | 0.017117 | 0.007628 | 0.074726 | 0.016147 | 0        | 0.751394 |
| T2D | rs163184  | fibre-total     | fruitw         | 0.022496 | 0.009455 | 0.003965 | 0.041027 | 0.017346 | 7.170175 | 0.374831 |
| T2D | rs1242735 | fibre-cereal    | fruit          | -0.04801 | 0.020385 | -0.08796 | -0.00805 | 0.018524 | 12.70752 | 0.33092  |
| BMI | rs7715256 | protein         | fat            | -0.10242 | 0.044354 | -0.18935 | -0.01549 | 0.020938 | 0        | 0.921712 |
| BMI | rs1112666 | carbohydrate    | fat            | 0.043581 | 0.019038 | 0.006267 | 0.080896 | 0.022071 | 0        | 0.600016 |
| IR  | rs308971  | protein         | fat            | -0.22522 | 0.098415 | -0.41811 | -0.03233 | 0.022112 | 32.02021 | 0.172349 |
| BMI | rs1288545 | MUFA            | protein        | -0.09952 | 0.043586 | -0.18495 | -0.01409 | 0.022411 | 0        | 0.629832 |
| BMI | rs1167827 | fibre-vegetable | fruit          | -0.05962 | 0.026133 | -0.11084 | -0.0084  | 0.022529 | 30.92792 | 0.181087 |
| BMI | rs7899106 | PUFA            | carbohydrate   | 0.309944 | 0.136247 | 0.042904 | 0.576984 | 0.022914 | 0        | 0.780279 |
| BMI | rs7715256 | protein         | SFA            | -0.09984 | 0.044564 | -0.18718 | -0.01249 | 0.025071 | 0        | 0.756689 |
| T2D | rs2943640 | protein         | fat            | 0.131845 | 0.059146 | 0.01592  | 0.24777  | 0.025805 | 15.23117 | 0.310415 |
| BMI | rs492400  | fibre-total     | fruitw         | -0.01769 | 0.007942 | -0.03326 | -0.00212 | 0.025922 | 0        | 0.638099 |
| IR  | rs308971  | protein         | SFA            | -0.22108 | 0.099312 | -0.41573 | -0.02643 | 0.026006 | 31.91649 | 0.173175 |
| BMI | rs1013228 | fibre-fruit     | fruit          | -0.03489 | 0.015688 | -0.06563 | -0.00414 | 0.026167 | 6.17415  | 0.382543 |
| BMI | rs9540493 | carbohydrate    | protein-animal | -0.04005 | 0.018021 | -0.07537 | -0.00473 | 0.02627  | 8.879879 | 0.361452 |
| IR  | rs731839  | protein-plant   | protein-animal | -0.26846 | 0.121924 | -0.50743 | -0.02949 | 0.027675 | 0        | 0.836634 |
| IR  | rs1113032 | protein-plant   | protein-animal | 0.4372   | 0.199237 | 0.046702 | 0.827699 | 0.028209 | 27.65237 | 0.20772  |
| BMI | rs1105740 | MUFA            | PUFA           | -0.17978 | 0.082236 | -0.34096 | -0.0186  | 0.028806 | 0        | 0.701269 |
| BMI | rs2365389 | PUFA            | protein        | 0.1411   | 0.064555 | 0.014575 | 0.267625 | 0.028835 | 0        | 0.806102 |
| BMI | rs9540493 | carbohydrate    | protein        | -0.04108 | 0.018858 | -0.07805 | -0.00412 | 0.029365 | 15.15177 | 0.311064 |
| IR  | rs7227237 | PUFA            | protein        | 0.192766 | 0.08851  | 0.019289 | 0.366242 | 0.029414 | 0        | 0.69817  |
| IR  | rs1113032 | protein-plant   | MUFA           | 0.400748 | 0.18492  | 0.038312 | 0.763184 | 0.030224 | 18.9776  | 0.279578 |
| T2D | rs1020317 | fibre-fruit     | fruit          | 0.095503 | 0.044096 | 0.009076 | 0.18193  | 0.030327 | 56.63609 | 0.023846 |
| BMI | rs1516725 | MUFA            | protein        | -0.13684 | 0.063285 | -0.26087 | -0.0128  | 0.0306   | 0        | 0.724417 |
| IR  | rs2943645 | protein         | SFA            | 0.126671 | 0.058728 | 0.011565 | 0.241776 | 0.031014 | 14.1534  | 0.319204 |
| IR  | rs1113032 | protein-plant   | PUFA           | 0.430083 | 0.199406 | 0.039256 | 0.820911 | 0.031019 | 27.58538 | 0.20827  |
| IR  | rs308971  | protein-animal  | fat            | -0.21541 | 0.099884 | -0.41118 | -0.01964 | 0.031038 | 43.96099 | 0.085516 |
| BMI | rs2112347 | protein-plant   | protein-animal | -0.21606 | 0.100247 | -0.41254 | -0.01958 | 0.031138 | 0        | 0.778034 |
| BMI | rs1105740 | MUFA            | SFA            | -0.17822 | 0.08275  | -0.3404  | -0.01603 | 0.031267 | 0        | 0.697024 |
| BMI | rs7899106 | PUFA            | SFA            | 0.296614 | 0.138032 | 0.026076 | 0.567151 | 0.031644 | 0        | 0.734206 |
| BMI | rs1112666 | carbohydrate    | protein-plant  | 0.040774 | 0.019012 | 0.003511 | 0.078036 | 0.031981 | 0        | 0.70178  |
| BMI | rs3736485 | carbohydrate    | protein-animal | -0.03689 | 0.017244 | -0.07069 | -0.00309 | 0.032412 | 3.068796 | 0.406176 |
| T2D | rs459193  | PUFA            | protein        | -0.17309 | 0.080923 | -0.33169 | -0.01448 | 0.032441 | 0        | 0.659472 |
| IR  | rs459193  | PUFA            | protein        | -0.17309 | 0.080923 | -0.33169 | -0.01448 | 0.032441 | 0        | 0.659472 |
| BMI | rs758747  | protein-animal  | MUFA           | -0.09698 | 0.045391 | -0.18595 | -0.00802 | 0.03263  | 0        | 0.453197 |
| IR  | rs7227237 | PUFA            | SFA            | 0.189334 | 0.088745 | 0.015397 | 0.363271 | 0.032887 | 0        | 0.715738 |
| BMI | rs2112347 | fibre-vegetable | fruit          | -0.04536 | 0.021265 | -0.08704 | -0.00368 | 0.032929 | 4.547563 | 0.395002 |
| BMI | rs1112666 | carbohydrate    | SFA            | 0.040891 | 0.019214 | 0.003232 | 0.07855  | 0.033321 | 0        | 0.684636 |
| IR  | rs9492443 | fibre-vegetable | fruit          | 0.054505 | 0.025612 | 0.004306 | 0.104703 | 0.033329 | 0        | 0.878501 |
| BMI | rs2365389 | PUFA            | carbohydrate   | 0.138005 | 0.064865 | 0.010873 | 0.265138 | 0.033372 | 0        | 0.858583 |
| BMI | rs1167827 | fibre-fruit     | fruit          | -0.0293  | 0.013781 | -0.05631 | -0.00229 | 0.03349  | 0        | 0.589437 |
| IR  | rs1113032 | protein-plant   | SFA            | 0.40708  | 0.191568 | 0.031613 | 0.782547 | 0.033588 | 22.97541 | 0.246399 |
| BMI | rs2033529 | fibre-total     | fruitw         | 0.017798 | 0.008389 | 0.001355 | 0.03424  | 0.033882 | 0        | 0.85123  |
| BMI | rs7239883 | protein         | SFA            | 0.096176 | 0.045448 | 0.007099 | 0.185252 | 0.03433  | 0        | 0.794842 |
| BMI | rs1288545 | MUFA            | PUFA           | -0.09324 | 0.044095 | -0.17967 | -0.00682 | 0.034463 | 0        | 0.531842 |
| BMI | rs7164727 | fibre-cereal    | fruit          | 0.030212 | 0.014294 | 0.002196 | 0.058228 | 0.03455  | 6.472793 | 0.380237 |

| GRS | snp       | macro           | submacro       | beta     | se       | lci      | uci      | p_int    | i_sq     | p_het    |
|-----|-----------|-----------------|----------------|----------|----------|----------|----------|----------|----------|----------|
| BMI | rs758747  | protein-animal  | fat            | -0.09534 | 0.045122 | -0.18377 | -0.0069  | 0.034616 | 0        | 0.506501 |
| BMI | rs2033732 | protein-plant   | fat            | -0.25248 | 0.119701 | -0.48709 | -0.01787 | 0.034923 | 0        | 0.494788 |
| IR  | rs308971  | protein-animal  | MUFA           | -0.21595 | 0.102469 | -0.41679 | -0.01511 | 0.035078 | 45.99866 | 0.073024 |
| T2D | rs2943640 | protein-plant   | PUFA           | 0.250925 | 0.119207 | 0.017284 | 0.484567 | 0.035296 | 0        | 0.53354  |
| BMI | rs1112666 | carbohydrate    | protein        | 0.039527 | 0.018814 | 0.002652 | 0.076403 | 0.035649 | 0        | 0.578254 |
| BMI | rs1310732 | protein-animal  | PUFA           | -0.16831 | 0.080138 | -0.32538 | -0.01124 | 0.03571  | 0        | 0.611583 |
| BMI | rs2112347 | protein-plant   | MUFA           | -0.21187 | 0.100884 | -0.4096  | -0.01414 | 0.035719 | 0        | 0.67641  |
| IR  | rs7227237 | PUFA            | carbohydrate   | 0.185651 | 0.088478 | 0.012238 | 0.359064 | 0.03588  | 0        | 0.715359 |
| T2D | rs780094  | MUFA            | PUFA           | -0.11104 | 0.052967 | -0.21485 | -0.00722 | 0.036053 | 5.328815 | 0.389039 |
| IR  | rs731839  | protein-plant   | SFA            | -0.25653 | 0.122447 | -0.49653 | -0.01654 | 0.036166 | 0        | 0.832788 |
| BMI | rs1112666 | carbohydrate    | protein-animal | 0.039438 | 0.018837 | 0.002519 | 0.076358 | 0.03629  | 0        | 0.601009 |
| T2D | rs2943640 | protein-plant   | protein-animal | 0.248348 | 0.118649 | 0.015801 | 0.480895 | 0.036337 | 0        | 0.6108   |
| BMI | rs1105740 | MUFA            | protein        | -0.17014 | 0.081454 | -0.32978 | -0.01049 | 0.036731 | 0        | 0.719033 |
| T2D | rs780094  | MUFA            | SFA            | -0.11057 | 0.053025 | -0.2145  | -0.00664 | 0.037049 | 5.075031 | 0.39098  |
| T2D | rs2943640 | protein-plant   | fat            | 0.24781  | 0.118944 | 0.014683 | 0.480937 | 0.037214 | 0        | 0.571937 |
| T2D | rs3802177 | protein-plant   | PUFA           | 0.26333  | 0.126557 | 0.015282 | 0.511377 | 0.03746  | 0        | 0.967886 |
| BMI | rs2365389 | PUFA            | SFA            | 0.134834 | 0.064822 | 0.007785 | 0.261882 | 0.03752  | 0        | 0.813916 |
| T2D | rs1163439 | PUFA            | protein        | -0.16449 | 0.079118 | -0.31956 | -0.00942 | 0.037615 | 0        | 0.86707  |
| BMI | rs7239883 | protein         | fat            | 0.093767 | 0.045171 | 0.005233 | 0.182302 | 0.037911 | 0        | 0.778832 |
| BMI | rs6091540 | fibre-total     | fruitw         | 0.017954 | 0.008652 | 0.000996 | 0.034912 | 0.037983 | 0        | 0.590972 |
| IR  | rs308971  | protein-animal  | SFA            | -0.2035  | 0.098075 | -0.39572 | -0.01127 | 0.037997 | 40.99521 | 0.10514  |
| BMI | rs1073368 | carbohydrate    | protein        | 0.038864 | 0.018745 | 0.002125 | 0.075603 | 0.038143 | 15.98271 | 0.304262 |
| IR  | rs1113032 | protein-plant   | fat            | 0.405724 | 0.19581  | 0.021944 | 0.789505 | 0.038262 | 26.20314 | 0.219652 |
| IR  | rs3864041 | fibre-cereal    | fruit          | 0.043878 | 0.021186 | 0.002355 | 0.085401 | 0.038347 | 37.56163 | 0.129674 |
| BMI | rs2033732 | protein-plant   | MUFA           | -0.24923 | 0.120373 | -0.48515 | -0.0133  | 0.038411 | 0        | 0.63274  |
| T2D | rs2075423 | fibre-cereal    | fruit          | 0.034765 | 0.016815 | 0.001809 | 0.067721 | 0.038681 | 8.40805  | 0.365162 |
| BMI | rs1516725 | MUFA            | PUFA           | -0.13234 | 0.064093 | -0.25796 | -0.00672 | 0.038935 | 0        | 0.873454 |
| BMI | rs1105740 | MUFA            | carbohydrate   | -0.16969 | 0.082271 | -0.33094 | -0.00844 | 0.039157 | 0        | 0.721312 |
| BMI | rs2112347 | protein-plant   | PUFA           | -0.20801 | 0.101047 | -0.40606 | -0.00997 | 0.039534 | 0        | 0.710705 |
| BMI | rs543874  | fibre-vegetable | fruit          | -0.05258 | 0.025547 | -0.10265 | -0.00251 | 0.039582 | 0.921854 | 0.42213  |
| BMI | rs1288545 | MUFA            | carbohydrate   | -0.09055 | 0.044049 | -0.17688 | -0.00421 | 0.039818 | 0        | 0.586056 |
| T2D | rs1027833 | fibre-vegetable | fruit          | -0.05484 | 0.026719 | -0.10721 | -0.00247 | 0.040114 | 19.09052 | 0.278643 |
| BMI | rs1073368 | carbohydrate    | protein-animal | 0.0384   | 0.018741 | 0.001668 | 0.075132 | 0.040465 | 15.64165 | 0.307057 |
| BMI | rs758747  | protein-animal  | PUFA           | -0.09271 | 0.045254 | -0.18141 | -0.00401 | 0.040499 | 0        | 0.507591 |
| BMI | rs1073368 | carbohydrate    | SFA            | 0.036358 | 0.017754 | 0.001561 | 0.071154 | 0.040569 | 6.243598 | 0.382007 |
| BMI | rs758747  | protein-animal  | SFA            | -0.09284 | 0.045399 | -0.18182 | -0.00386 | 0.040849 | 0        | 0.506121 |
| T2D | rs2943640 | protein-plant   | MUFA           | 0.243358 | 0.119036 | 0.010053 | 0.476664 | 0.040912 | 0        | 0.601512 |
| BMI | rs1516725 | MUFA            | carbohydrate   | -0.13005 | 0.063632 | -0.25477 | -0.00533 | 0.040977 | 0        | 0.856815 |
| BMI | rs2112347 | protein-plant   | SFA            | -0.20645 | 0.101043 | -0.40449 | -0.00841 | 0.04103  | 0        | 0.75454  |
| BMI | rs758747  | protein         | fat            | -0.10038 | 0.049154 | -0.19672 | -0.00404 | 0.041132 | 0        | 0.747126 |
| IR  | rs308971  | protein-animal  | PUFA           | -0.20278 | 0.099345 | -0.39749 | -0.00807 | 0.041233 | 42.77734 | 0.093155 |
| IR  | rs731839  | protein-plant   | PUFA           | -0.24943 | 0.122234 | -0.489   | -0.00985 | 0.041294 | 0        | 0.757378 |
| T2D | rs3802177 | carbohydrate    | protein-animal | 0.046776 | 0.022928 | 0.001838 | 0.091713 | 0.041336 | 7.863979 | 0.369423 |
| BMI | rs1685148 | carbohydrate    | protein-animal | -0.073   | 0.035839 | -0.14324 | -0.00275 | 0.041668 | 0        | 0.669175 |
| T2D | rs780094  | MUFA            | carbohydrate   | -0.11164 | 0.054815 | -0.21908 | -0.00421 | 0.041681 | 8.556442 | 0.363996 |
| BMI | rs9540493 | carbohydrate    | protein-plant  | -0.03778 | 0.018549 | -0.07413 | -0.00142 | 0.041695 | 11.75523 | 0.338585 |
| BMI | rs2365389 | protein-plant   | PUFA           | -0.28068 | 0.13785  | -0.55086 | -0.0105  | 0.041737 | 39.24422 | 0.117432 |
| BMI | rs1307896 | PUFA            | protein        | 0.156906 | 0.077104 | 0.005785 | 0.308028 | 0.041852 | 0        | 0.564212 |
| IR  | rs7973683 | carbohydrate    | fat            | -0.03961 | 0.019493 | -0.07782 | -0.0014  | 0.042157 | 0        | 0.693951 |
| BMI | rs9540493 | carbohydrate    | SFA            | -0.03608 | 0.017783 | -0.07093 | -0.00123 | 0.042464 | 5.137115 | 0.390506 |

| GRS | snp       | macro          | submacro       | beta     | se       | lci      | uci      | p_int    | i_sq     | p_het    |
|-----|-----------|----------------|----------------|----------|----------|----------|----------|----------|----------|----------|
| T2D | rs1163439 | PUFA           | carbohydrate   | -0.16119 | 0.079544 | -0.31709 | -0.00529 | 0.042717 | 0        | 0.849307 |
| T2D | rs2943640 | protein-plant  | SFA            | 0.241325 | 0.11911  | 0.007874 | 0.474776 | 0.042757 | 0        | 0.575101 |
| IR  | rs6066149 | protein-plant  | protein-animal | -0.27384 | 0.135198 | -0.53882 | -0.00886 | 0.042817 | 0        | 0.532456 |
| BMI | rs1516725 | MUFA           | SFA            | -0.12951 | 0.063961 | -0.25487 | -0.00415 | 0.042881 | 0        | 0.848288 |
| BMI | rs2365389 | protein-plant  | fat            | -0.26264 | 0.129749 | -0.51694 | -0.00834 | 0.042947 | 33.4958  | 0.16069  |
| T2D | rs780094  | PUFA           | SFA            | 0.204118 | 0.101035 | 0.006093 | 0.402144 | 0.043356 | 31.39684 | 0.177326 |
| BMI | rs1310732 | protein-animal | fat            | -0.16173 | 0.0801   | -0.31872 | -0.00473 | 0.043481 | 0        | 0.69406  |
| BMI | rs2365389 | protein-plant  | MUFA           | -0.27825 | 0.137953 | -0.54864 | -0.00787 | 0.043694 | 39.79366 | 0.113523 |
| IR  | rs1113032 | fibre-total    | fruitw         | 0.034536 | 0.017163 | 0.000897 | 0.068174 | 0.044195 | 38.06322 | 0.125984 |
| BMI | rs1288545 | MUFA           | SFA            | -0.08908 | 0.044268 | -0.17584 | -0.00231 | 0.0442   | 0        | 0.534276 |
| IR  | rs1045241 | protein-animal | SFA            | 0.105375 | 0.052423 | 0.002629 | 0.208122 | 0.044419 | 0        | 0.633459 |
| BMI | rs1310732 | protein-animal | MUFA           | -0.161   | 0.080136 | -0.31806 | -0.00393 | 0.044535 | 0        | 0.673966 |
| BMI | rs2033732 | protein-plant  | protein-animal | -0.24124 | 0.120086 | -0.4766  | -0.00587 | 0.044552 | 0        | 0.590287 |
| IR  | rs3864041 | protein-plant  | SFA            | 0.241496 | 0.120319 | 0.005675 | 0.477316 | 0.044735 | 0        | 0.87534  |
| BMI | rs2365389 | protein-plant  | SFA            | -0.27971 | 0.139521 | -0.55317 | -0.00625 | 0.044987 | 40.4119  | 0.109181 |
| IR  | rs731839  | protein-plant  | fat            | -0.24417 | 0.122008 | -0.48331 | -0.00504 | 0.045361 | 0        | 0.769939 |
| BMI | rs1307896 | PUFA           | SFA            | 0.154909 | 0.07744  | 0.00313  | 0.306689 | 0.04546  | 0        | 0.726588 |
| BMI | rs1073368 | carbohydrate   | protein-plant  | 0.036103 | 0.018052 | 0.000722 | 0.071484 | 0.045505 | 9.664813 | 0.355254 |
| IR  | rs3864041 | protein-plant  | PUFA           | 0.239687 | 0.12008  | 0.004334 | 0.47504  | 0.045928 | 0        | 0.79263  |
| BMI | rs2820292 | PUFA           | carbohydrate   | 0.133467 | 0.066914 | 0.002317 | 0.264616 | 0.046088 | 0        | 0.750275 |
| T2D | rs849135  | protein        | fat            | 0.101289 | 0.050875 | 0.001576 | 0.201002 | 0.046488 | 0        | 0.669926 |
| T2D | rs1163439 | PUFA           | SFA            | -0.15774 | 0.079395 | -0.31335 | -0.00213 | 0.046948 | 0        | 0.819668 |
| T2D | rs3802177 | protein-plant  | MUFA           | 0.25008  | 0.126256 | 0.002622 | 0.497538 | 0.047622 | 0        | 0.974301 |
| BMI | rs2820292 | PUFA           | SFA            | 0.132521 | 0.066968 | 0.001267 | 0.263776 | 0.047829 | 0        | 0.80307  |
| BMI | rs1685148 | carbohydrate   | protein        | -0.07065 | 0.035739 | -0.1407  | -0.0006  | 0.048062 | 0        | 0.655832 |
| BMI | rs2033732 | protein-plant  | SFA            | -0.23847 | 0.120729 | -0.4751  | -0.00185 | 0.048239 | 0        | 0.473563 |
| T2D | rs1125765 | PUFA           | SFA            | 0.251306 | 0.127262 | 0.001877 | 0.500735 | 0.048301 | 37.66341 | 0.128923 |
| BMI | rs3736485 | carbohydrate   | protein        | -0.03448 | 0.01749  | -0.06876 | -0.0002  | 0.048648 | 5.429392 | 0.388268 |
| BMI | rs1685148 | carbohydrate   | fat            | -0.07107 | 0.036059 | -0.14175 | -0.0004  | 0.048722 | 0        | 0.808037 |
| IR  | rs7973683 | carbohydrate   | protein-animal | -0.03852 | 0.019563 | -0.07687 | -0.00018 | 0.048939 | 0        | 0.662636 |
| BMI | rs977747  | protein-animal | SFA            | -0.09591 | 0.048719 | -0.1914  | -0.00042 | 0.049    | 22.84033 | 0.247521 |
| IR  | rs1045241 | protein-animal | MUFA           | 0.103252 | 0.052459 | 0.000434 | 0.206071 | 0.049041 | 0        | 0.686748 |
| BMI | rs1172767 | protein-plant  | fat            | 0.37915  | 0.192756 | 0.001354 | 0.756945 | 0.049184 | 0        | 0.71259  |
| BMI | rs758747  | protein        | SFA            | -0.09722 | 0.049543 | -0.19432 | -0.00012 | 0.049725 | 0        | 0.707793 |
| T2D | rs1125765 | PUFA           | carbohydrate   | 0.25551  | 0.130308 | 0.000112 | 0.510909 | 0.0499   | 39.75135 | 0.113823 |

## ESM Table 6: An example of interaction findings comparing multiple imputation and complete case analysis

| Unweighted T2D<br>GRS (per SD) x<br>Macronutrient<br>(g/1000kcal) | Multiple imputation analysis results<br>(9742 cases, 12158 noncases) |          | Complete case analysis results<br>(9403 cases, 11745 noncases) |          |
|-------------------------------------------------------------------|----------------------------------------------------------------------|----------|----------------------------------------------------------------|----------|
|                                                                   | Beta (se)                                                            | <i>P</i> | Beta (se)                                                      | <i>P</i> |
| <i>Total dietary fibre</i>                                        | 0.001(0.006)                                                         | 0.875    | 0.001(0.007)                                                   | 0.839    |
| <i>Cereal fibre</i>                                               | 0.006(0.011)                                                         | 0.606    | 0.002(0.016)                                                   | 0.902    |

Abbreviation: SSB: sugar sweetened beverage, BMI: body mass index, T2D: type 2 diabetes, GRS: genetic risk score, p: p value for interaction

Modelling the same as that in ESM Table 4, model 4.

**Conclusion: no substantial difference in results between analysis approaches**

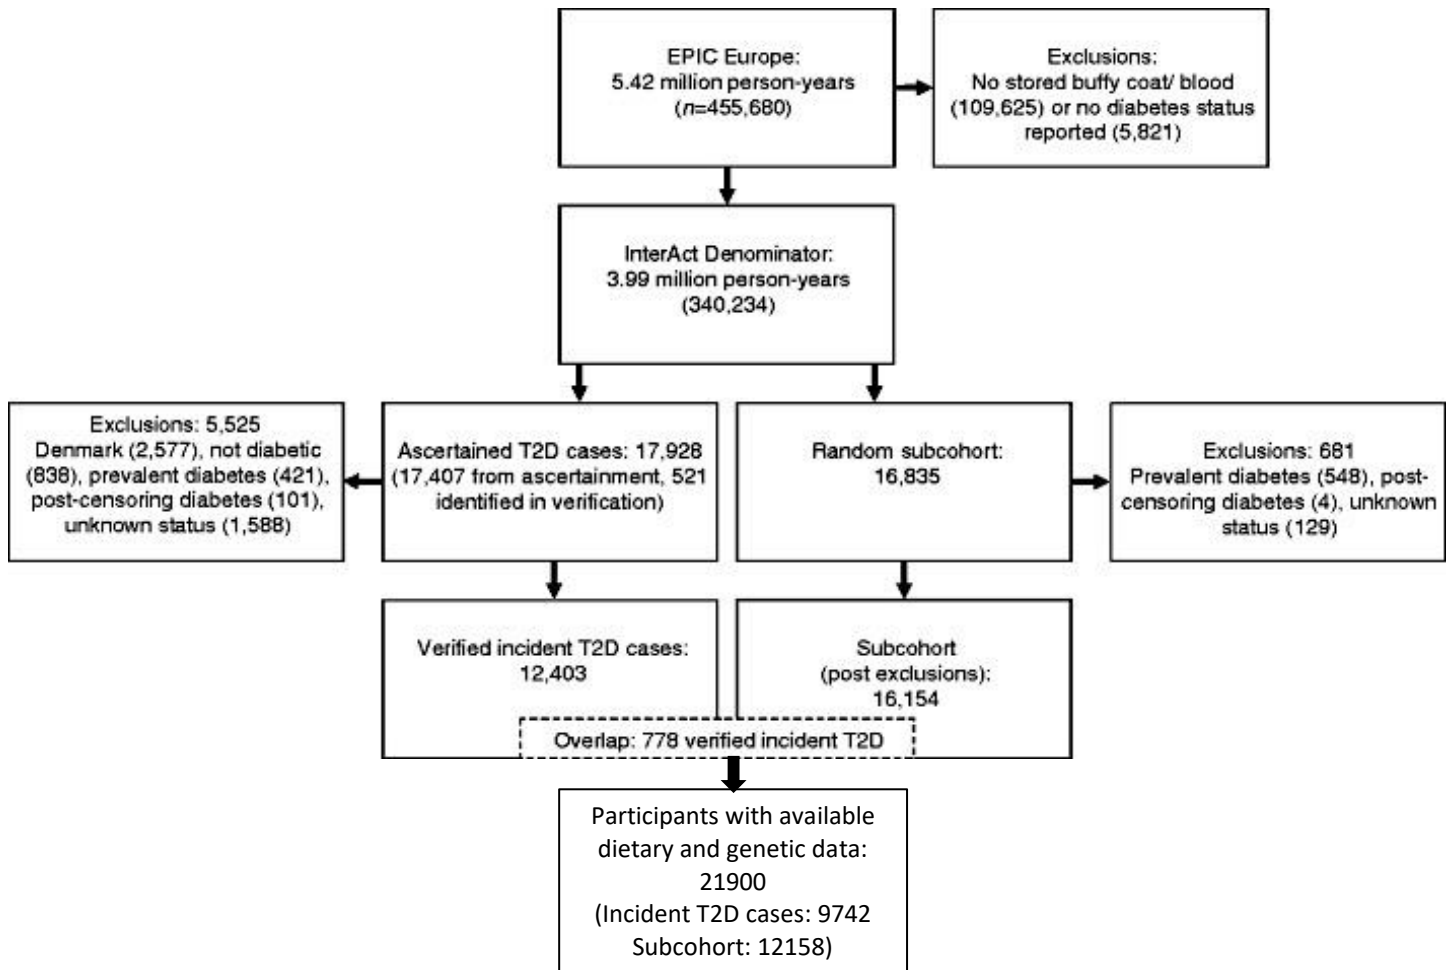

**ESM Figure 1: Flow chart of participant inclusion and exclusions, adapted from Langenberg et al., 2011[8]**

Reprinted by permission from Springer Nature: Diabetologia Design and cohort description of the InterAct Project: an examination of the interaction of genetic and lifestyle factors on the incidence of type 2 diabetes in the EPIC study, Langenberg et al., Copyright 2011.

### Variation in MICE sets (fibre intake x T2D grs on T2D)

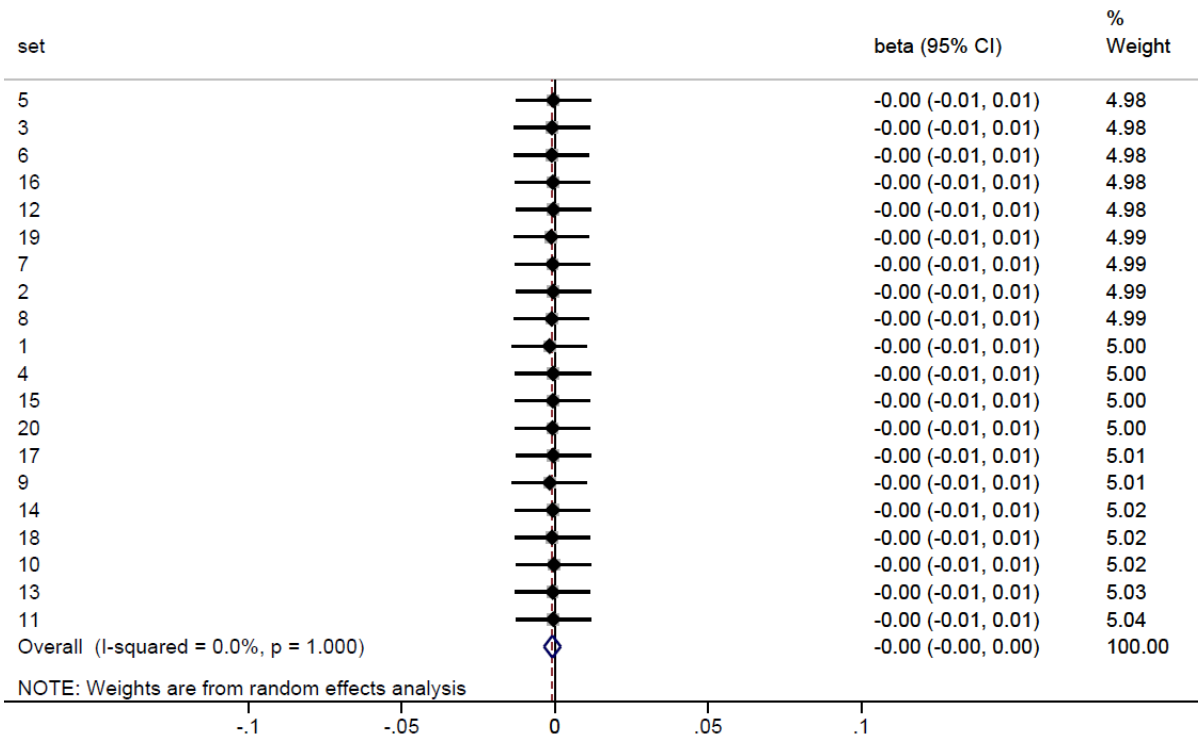

Beta coefficient of the interaction between fibre and T2D GRS on incident T2D

### ESM Figure 2: Comparison between 20 imputed datasets for the interaction between total fibre intake and T2D genetic risk score on incident T2D

Abbreviation: MICE: multiple imputation using chained equations, T2D: type 2 diabetes, GRS: genetic risk score

Modelling same as model 4 of ESM Table 4. Here, analysis performed by country and pooled using random effects meta-analysis (no chip-specific analysis was undertaken).

**Conclusion: total variation= within + between dataset variation is very small. Dataset number 15 was therefore chosen, at random, for all analyses presented in this paper.**

|                          |          |
|--------------------------|----------|
| within dataset variance  | 3.89E-05 |
| between dataset variance | 1.32E-07 |

## Macronutrient intake x SNP interactions and incident T2D (with isocaloric macronutrient substitution)

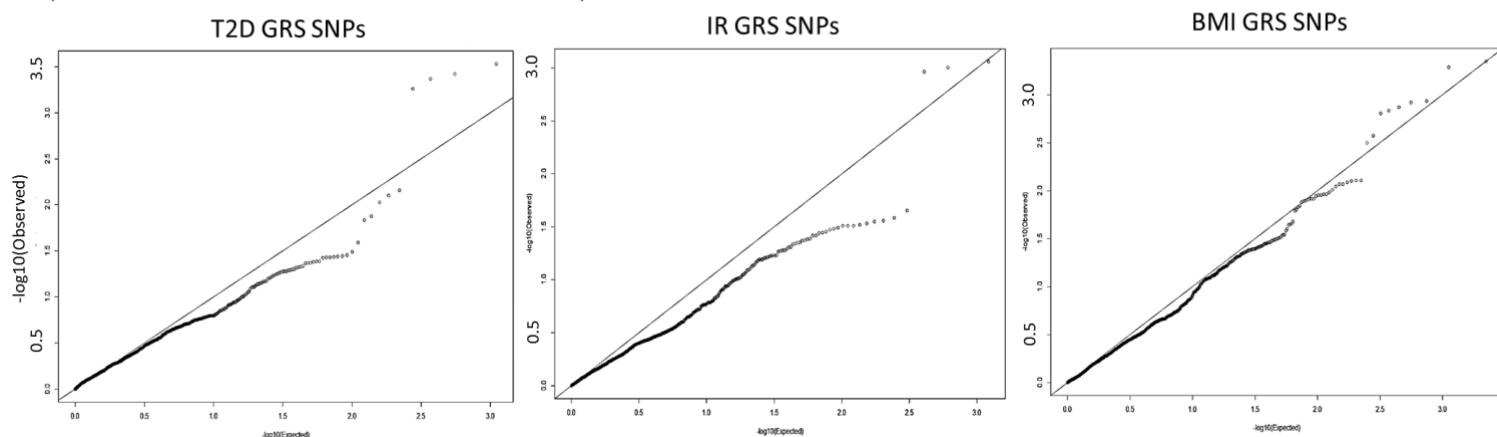

## Fibre intake x SNP interactions and incident T2D

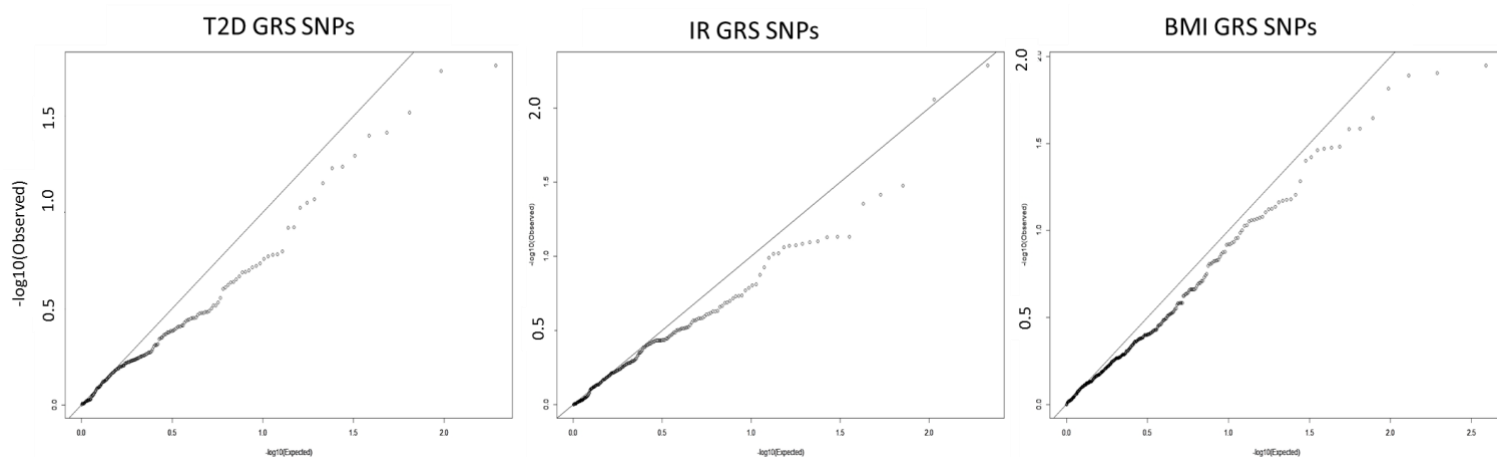

### ESM Figure 3: QQ plot of pvalues for the interactions between individual SNPs for each of the genetic risk scores and macronutrients or dietary fibre on T2D (with isocaloric macronutrient substitution): EPIC-InterAct Study

All interactions are based on the most adjusted models (previously reported for ESM tables 4). None of the individual SNP interactions were significant after accounting for multiple testing. P value for interaction threshold for significance  $<9.50E-6$  ( $0.05/5265$  tests).

Please note that each individual GRS graph contains multiple sets of interaction analyses, therefore the expected p values may be conservative due to correlated analyses. That is, for the interaction between fibre intake and T2D GRS, this includes interactions between T2D GRS and total fibre, T2D GRS and cereal fibre, T2D GRS and vegetable fibre and T2D GRS and fruit fibre on incident T2D

A list of SNP x macronutrient interactions with value for interaction  $<0.05$  are available in ESM Table 6 (Excel)



## References

1. White IR, Royston P, Wood AM (2011) Multiple imputation using chained equations: Issues and guidance for practice. *Stat Med* 30:377–399 . doi: 10.1002/sim.4067
2. Sluijs I, Beulens JWJ, Schouw YT Van Der, et al (2013) Dietary Glycemic Index , Glycemic Load, and Digestible Carbohydrate Intake Are Not Associated with Risk of Type 2 Diabetes in Eight European Countries. *J Nutr* 143:93–99 . doi: 10.3945/jn.112.165605.93
3. van Nielen M, Feskens EJM, Mensink M, et al (2014) Dietary protein intake and incidence of type 2 diabetes in Europe: the EPIC-InterAct Case-Cohort Study. *Diabetes Care* 37:1854–62 . doi: 10.2337/dc13-2627
4. The InterAct Consortium (2015) Dietary fibre and incidence of type 2 diabetes in eight European countries: the EPIC-InterAct Study and a meta-analysis of prospective studies. *Diabetologia* 58:1394–408 . doi: 10.1007/s00125-015-3585-9
5. VanderWeele TJ (2015) *Explanation in Causal Inference: Methods for Mediation and Interaction*. Oxford University Press, USA
6. Willett WC (2013) *Nutritional epidemiology*, 3rd ed. Oxford University Press, New York
7. Li J, Ji L (2005) Adjusting multiple testing in multilocus analyses using the eigenvalues of a correlation matrix. *Heredity (Edinb)* 95:221–227 . doi: 10.1038/sj.hdy.6800717
8. Langenberg C, Sharp S, Forouhi NG, et al (2011) Design and cohort description of the InterAct Project: an examination of the interaction of genetic and lifestyle factors on the incidence of type 2 diabetes in the EPIC Study. *Diabetologia* 54:2272–82 . doi: 10.1007/s00125-011-2182-9
